# Supplementary material for: Technological Feature Assessment of Lactic Acid Bacteria Isolated from Cricket Powder’s Spontaneous Fermentation as Potential Starters for Cricket-Wheat Bread Production
Source: PubMed Central journal article supplement (PMC7555194; doi:10.3390/foods9091322), 2020-09-19
Supplement: foods-09-01322-s001.pdf [file foods-09-01322-s001.pdf]

## Supplementary

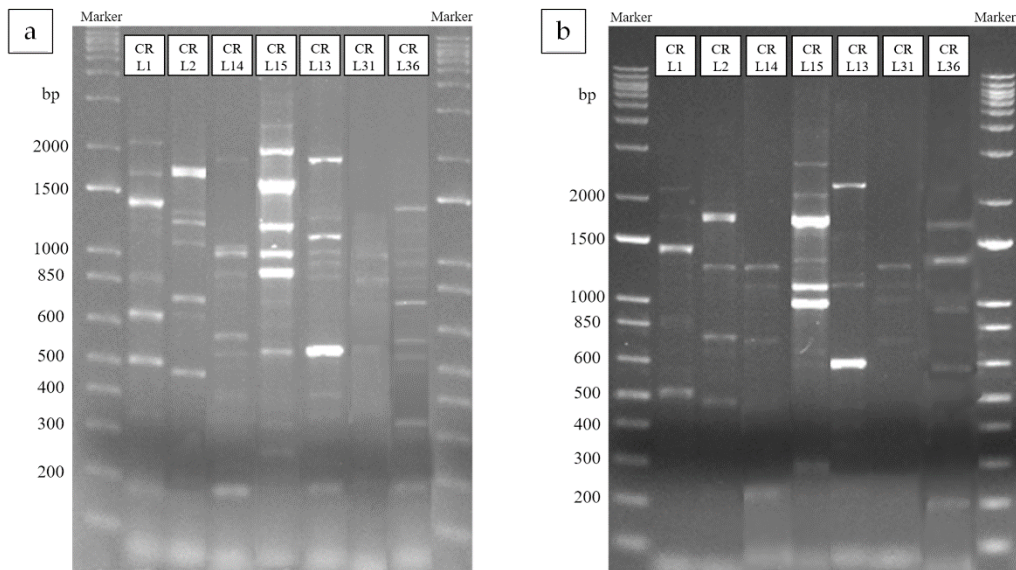

**Figure S1.** Randomly Amplified Polymorphic DNA-Polymerase Chain Reaction (RAPD-PCR) patterns of *Lp. plantarum* CR L1, *W.confusa* CR L2, *Lc. garvieae* CR L14, *Ll. sakei* CR L15, *Ll. curvatus* CR L13, *Lc. garvieae* CR L31, *E. durans* CR L36, obtained by using primer – along with RD1(a) and primer – along with RD1(b); Marker L100 DNA ladder.

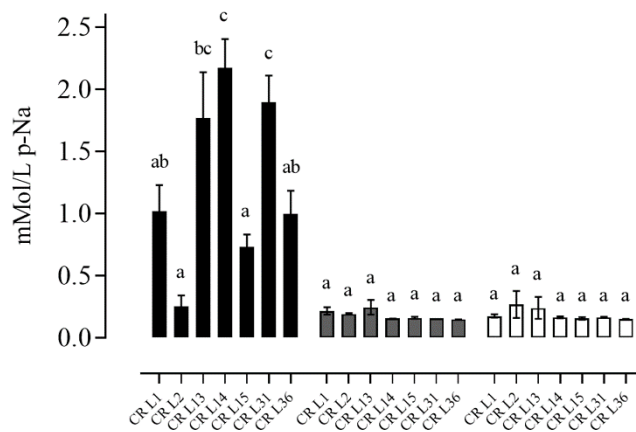

**Figure S2.** LAB peptidase activities, PepNC (black bars), PepA (grey bars) and PepO (white bars). Different letters (a–d) indicate statistically significant differences ( $p < 0.05$ ). The data are the means of three independent experiments (mean  $\pm$  standard deviations).

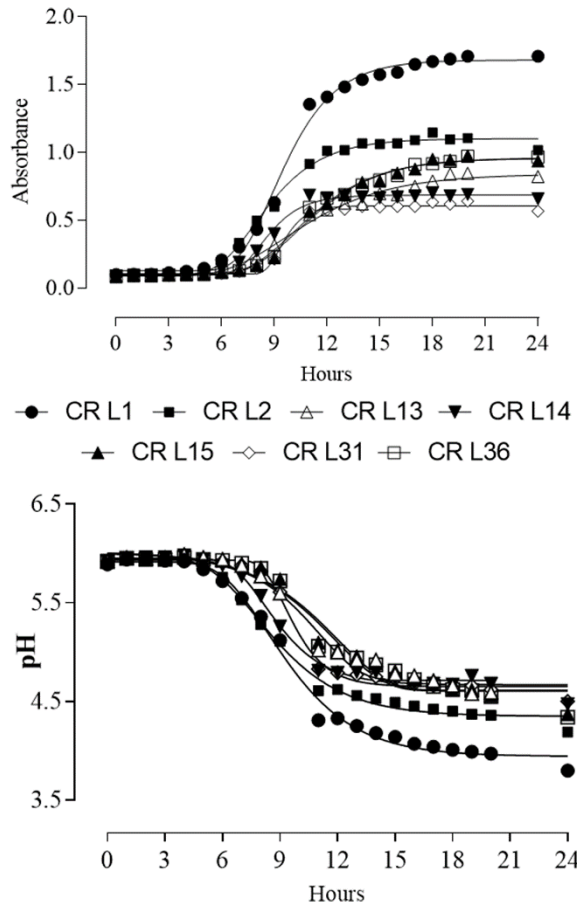

**Figure S3.** Growth (upper graph) and pH (lower graph) kinetics of lactic acid bacteria in MRS broth monitored for 24 hour at 30°C.

**Table S1.** Acidification parameters (pH and Total Titratable Acidity, TTA, organic acids), volume increase (%  $\Delta V/V_0$ ), microorganism concentrations (LAB and yeast) of the doughs at the end of fermentation;  $\Delta$ : difference between the final and the initial value). Results are expressed as average  $\pm$  standard deviation ( $n = 3$ ).

|            | Final pH                     | $\Delta$ pH                   | Final TTA<br>(mL)            | $\Delta V/V_{in} \times$<br>100 | Lactic acid<br>(g/100 g)     | Acetic<br>acid<br>(g/100 g) | QF   | LAB<br>(CFU/g)                               | Yeast<br>(CFU/g)                             |
|------------|------------------------------|-------------------------------|------------------------------|---------------------------------|------------------------------|-----------------------------|------|----------------------------------------------|----------------------------------------------|
| <b>SD</b>  | 4.46 $\pm$ 0.06 <sup>a</sup> | -0.44 $\pm$ 0.05 <sup>a</sup> | 2.95 $\pm$ 0.35 <sup>a</sup> | 144 $\pm$ 10 <sup>b</sup>       | 0.19 $\pm$ 0.03 <sup>a</sup> | 0.02 $\pm$ 0.0 <sup>a</sup> | 6.33 | (4.90 $\pm$ 0.78) $\times 10^8$ <sup>a</sup> | (6.40 $\pm$ 0.22) $\times 10^7$ <sup>a</sup> |
| <b>CSD</b> | 5.15 $\pm$ 0.18 <sup>b</sup> | -0.51 $\pm$ 0.25 <sup>a</sup> | 6.80 $\pm$ 0.14 <sup>b</sup> | 89 $\pm$ 8 <sup>a</sup>         | 0.20 $\pm$ 0.02 <sup>a</sup> | 0.03 $\pm$ 0.0 <sup>b</sup> | 4.33 | (4.73 $\pm$ 0.32) $\times 10^8$ <sup>a</sup> | (7.20 $\pm$ 0.44) $\times 10^7$ <sup>a</sup> |
| <b>CBY</b> | Nd                           | nd                            | 7.58 $\pm$ 2.79 <sup>b</sup> | 72 $\pm$ 9 <sup>a</sup>         | <0.01                        | nd                          |      |                                              | (7.00 $\pm$ 0.10) $\times 10^7$ <sup>a</sup> |

SD: dough with sourdough and only wheat flour; CSD: dough with sourdough and made of wheat flour and cricket powder; CBY: dough with baker's yeast and made of wheat flour and cricket powder. Values in the same column with different letters (a-b) are significantly different ( $p < 0.05$ ). nd: not determined.
